# Supplementary material for: A polarization-sensitive photothermoelectric photodetector based on mixed-dimensional SWCNT–MoS2 heterostructures
Source: PubMed Central journal article supplement — Nanoscale Adv. 2022 Sep 25;4(24):5290–6. doi: 10.1039/d2na00609j (PMC9724606; doi:10.1039/d2na00609j), 2022-09-25
Supplement: NA-004-D2NA00609J-s001.pdf [file NA-004-D2NA00609J-s001.pdf]

Supplementary Information for

**Polarization-Sensitive Photothermoelectric Photodetector Based on Mixed-Dimensional SWCNT-MoS<sub>2</sub> Heterostructures**

Pei-Yu Huang<sup>a</sup>, Hong-Ji Chen<sup>a</sup>, Jing-Kai Qin<sup>a,\*</sup>, Liang Zhen<sup>a,b</sup> and Cheng-Yan Xu<sup>a,b,\*</sup>

<sup>a</sup> Sauvage Laboratory for Smart Materials, School of Materials Science and Engineering, Harbin Institute of Technology (Shenzhen), Shenzhen 518055, China

<sup>b</sup> MOE Key Laboratory of Micro-System and Micro-Structures Manufacturing, Harbin Institute of Technology, Harbin 150080, China

\* E-mail addresses: [jk.qin@hit.edu.cn](mailto:jk.qin@hit.edu.cn) ; [cy\\_xu@hit.edu.cn](mailto:cy_xu@hit.edu.cn)

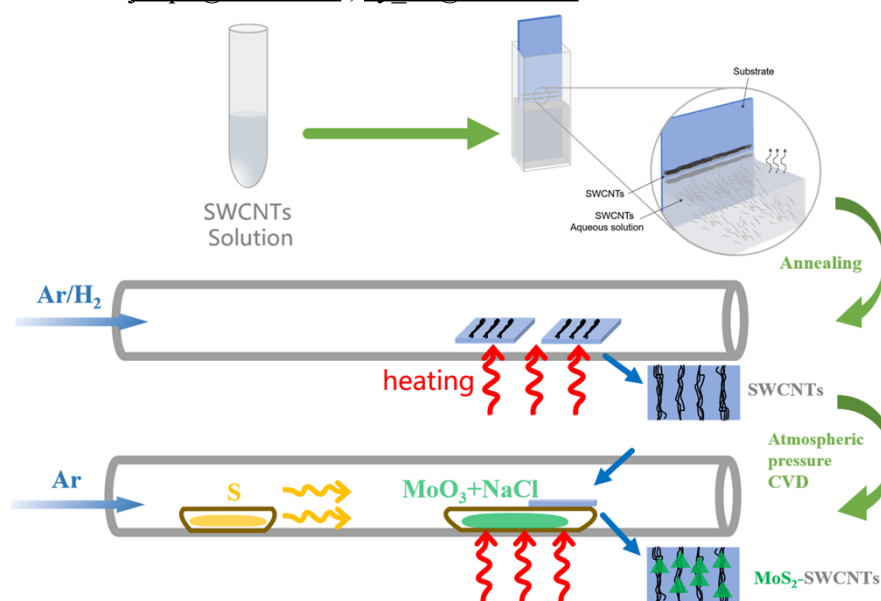

**Fig. S1** Schematic diagram for SWCNT-MoS<sub>2</sub> hybrid films preparation.

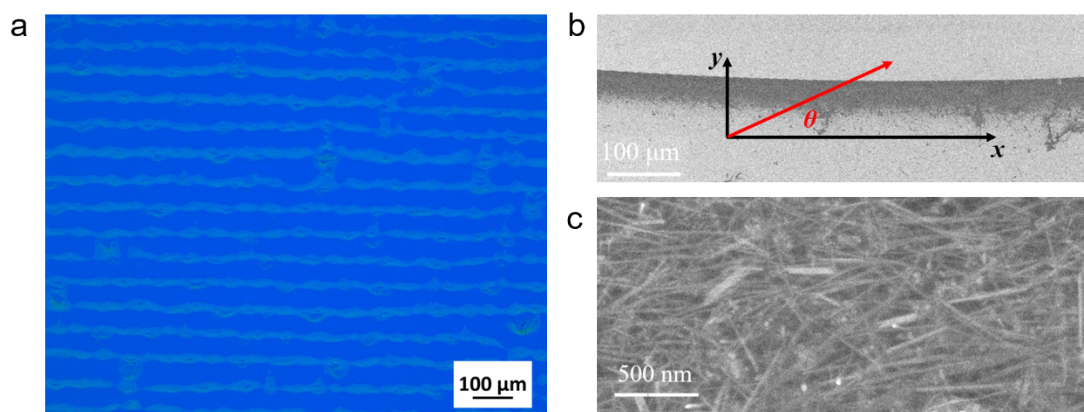

**Fig. S2** Structural characterization of as-fabricated bare SWCNT films. (a) Optical image of the SWCNT films on SiO<sub>2</sub>/Si substrate. (b) SEM and (c) magnified SEM image of the SWCNT films.

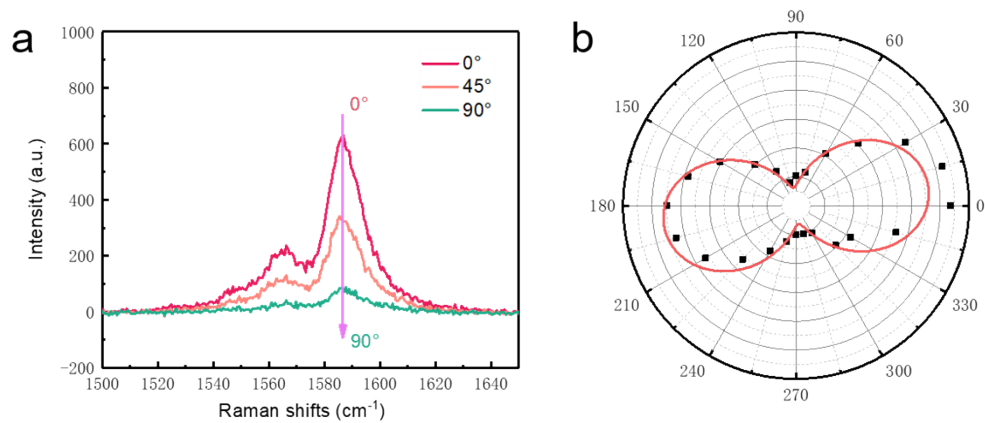

**Fig. S3** Polarization-resolved Raman spectra for SWCNT films. (a) Polarization-sensitive Raman spectrum of aligned film. (b) Polar coordinates of the Polarization-resolved Raman spectra of G mode.

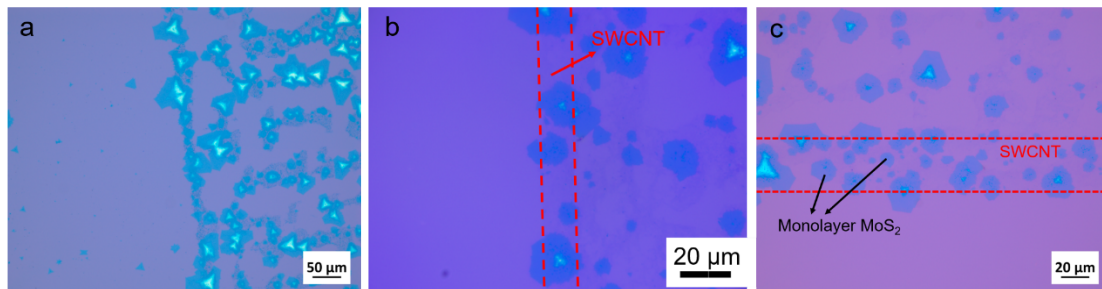

**Fig. S4** Structural characterization of as-fabricated SWCNT-MoS<sub>2</sub> hybrid films. (a) Optical image of continuous MoS<sub>2</sub> film along the parallel direction of SWCNT strips on SiO<sub>2</sub>/Si substrate. (b-c) Individual MoS<sub>2</sub> nanosheet distribute on SWCNT films.

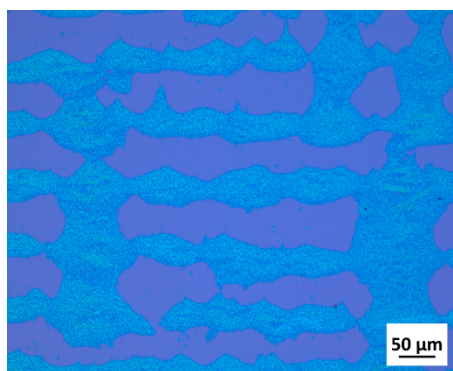

**Fig. S5** The morphology of SWCNT-MoS<sub>2</sub> hybrid films without hydrogen annealing process.

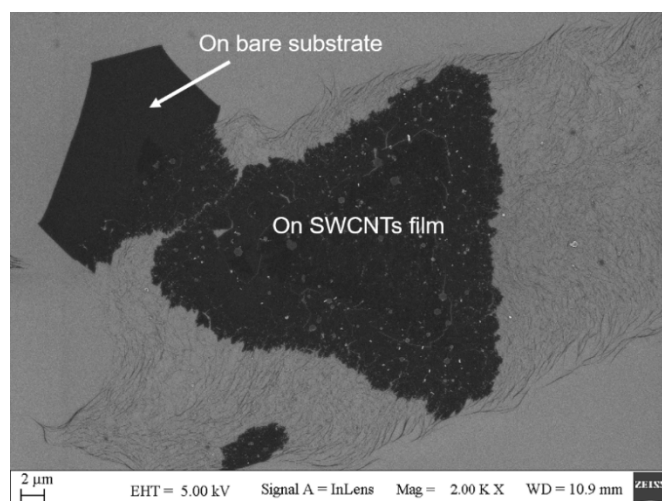

**Fig. S6** The morphology of monolayer MoS<sub>2</sub> on different substrates.

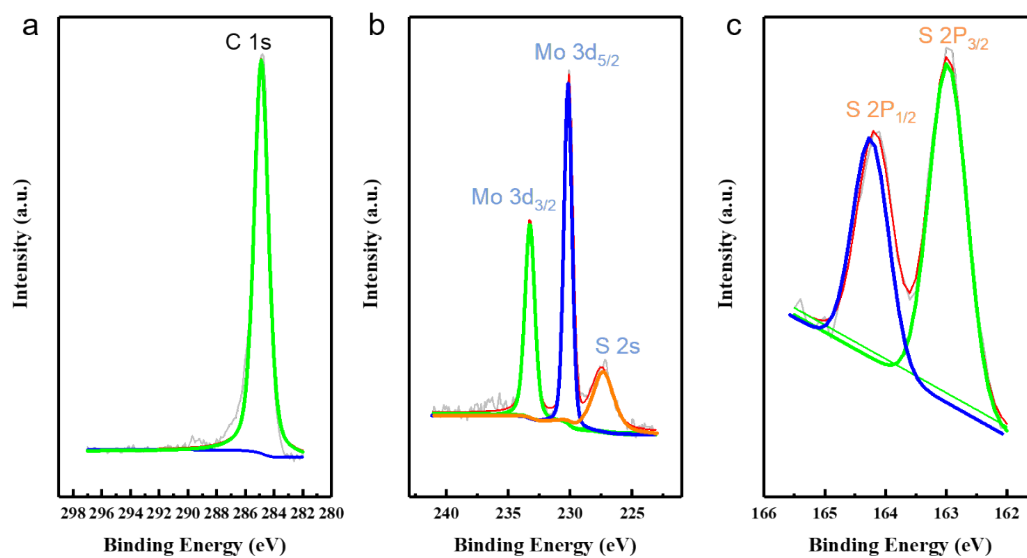

**Fig. S7** Chemical composition of SWCNT-MoS<sub>2</sub> hybrid films. (a) C 1s, (b) Mo 3d and (c) S 2p XPS characteristic peak.

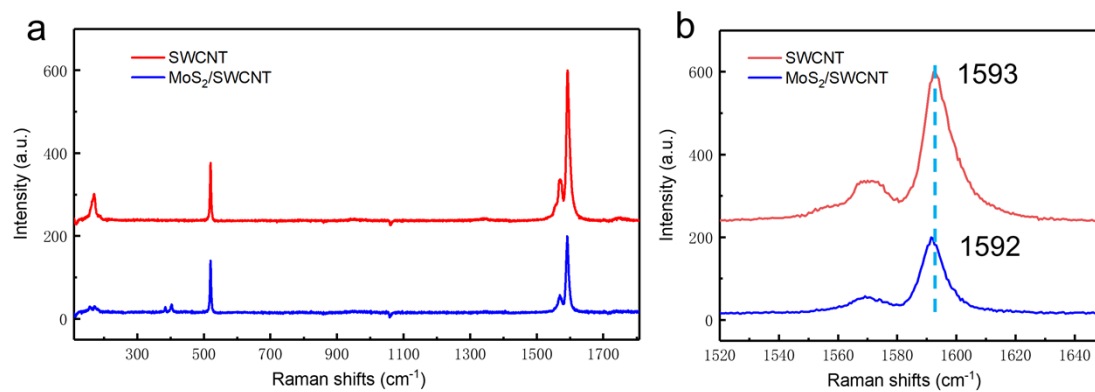

**Fig. S8** Raman spectra of SWCNT-MoS<sub>2</sub> hybrid films. (a) Wide range and (b) magnified Raman spectra for SWCNT-MoS<sub>2</sub> hybrid structures.

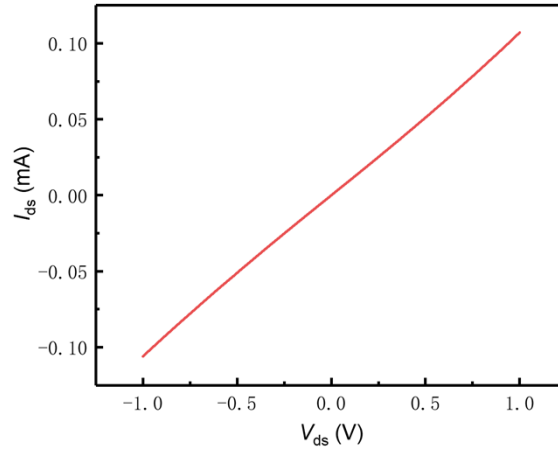

**Fig. S9**  $I_{ds}$ - $V_{ds}$  characteristic of the PTE detector with wide range from -1V to 1V at dark condition.

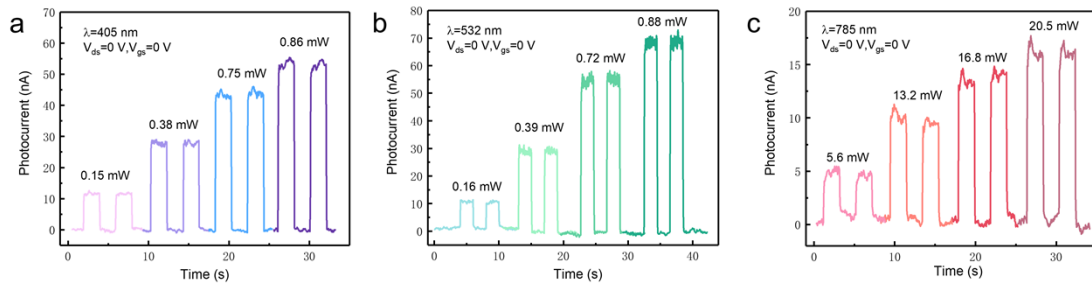

**Fig. S10** Photoresponse of the device under different 405, 532, and 785 nm laser intensity, respectively.

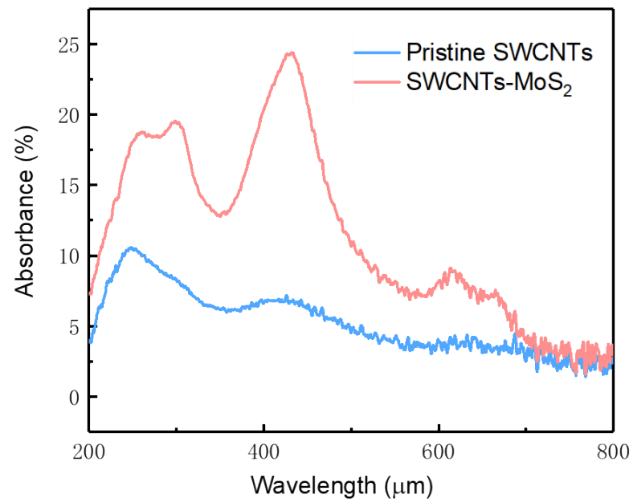

**Fig. S11** Absorption spectra of SWCNT-MoS<sub>2</sub> hybrid films and pure MoS<sub>2</sub>, respectively.

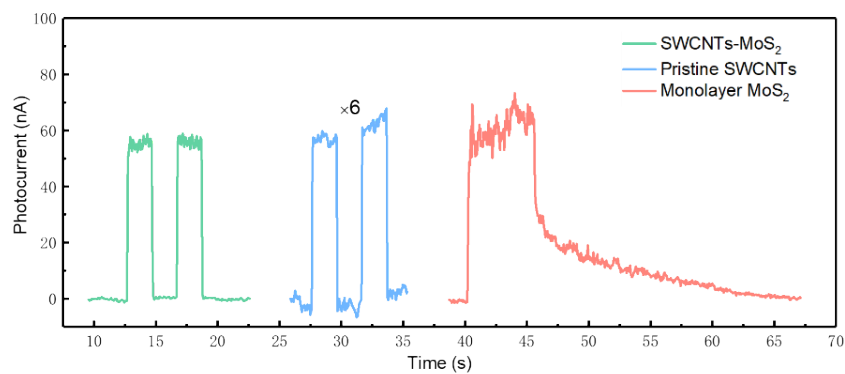

**Fig. S12** Photoresponse of the SWCNT-MoS<sub>2</sub>, monolayer MoS<sub>2</sub>, and pristine SWCNT device at the same 532 nm laser intensity, respectively.

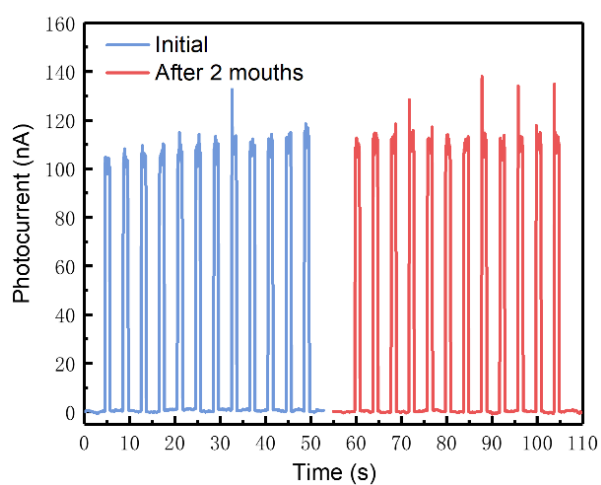

**Fig. S13** The environmental stability of SWCNT-MoS<sub>2</sub> hybrid films after exposure to air for 2 months.

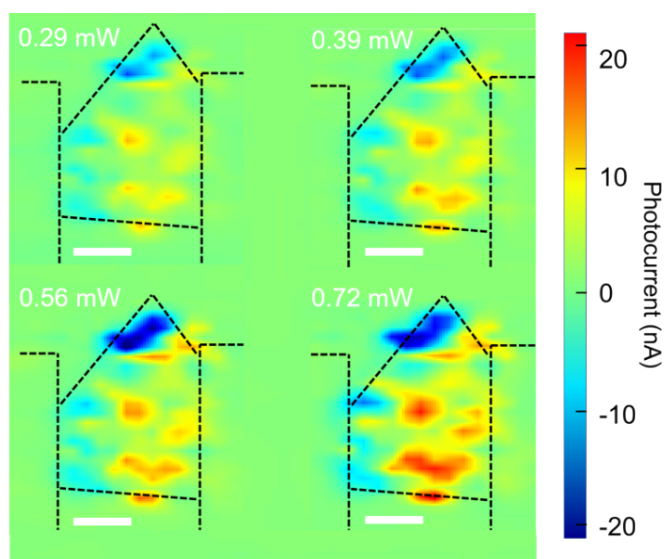

**Fig. S14** Powder-dependent spatial distribution of photocurrent for hybrid structures. Scale bar: 2 μm.

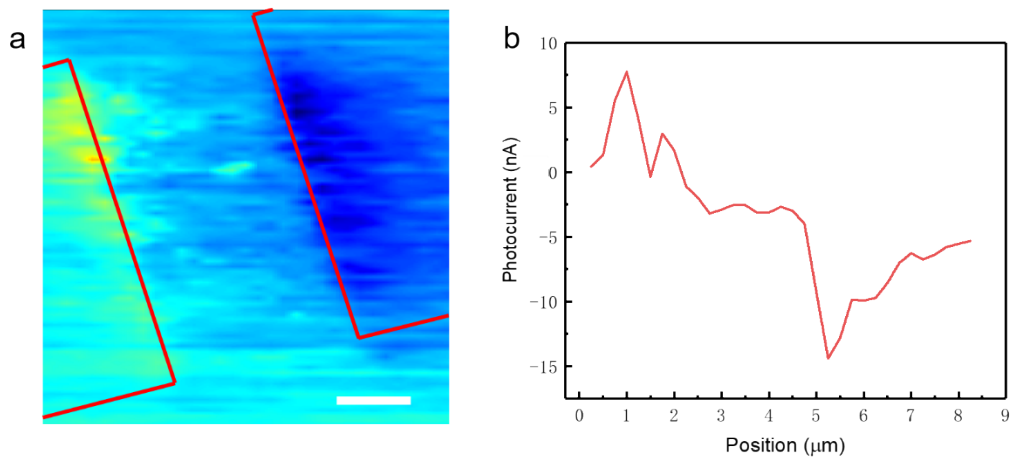

**Fig. S15** Spatial distribution of photocurrent for bare SWCNT films. (a) SPCM of pristine SWCNT devices. (b) The current intensity profile of the same line cut along the center of channel. Scale bar: 2  $\mu\text{m}$ .

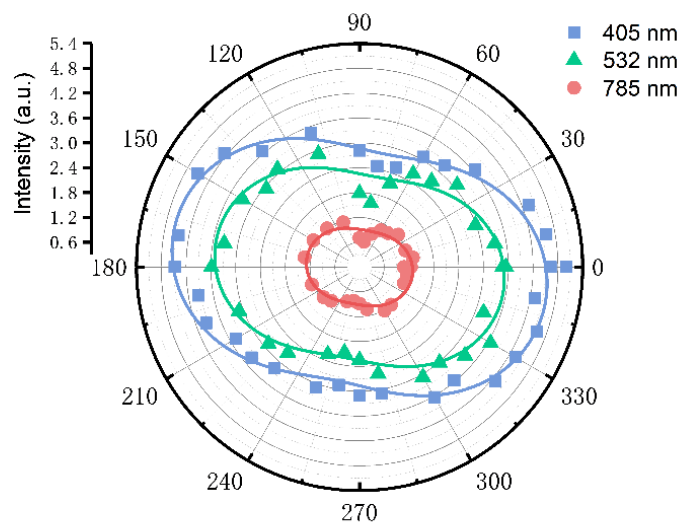

**Fig. S16** Polar coordinates of the polarization-sensitive absorbance at 405, 532 and 785 nm.

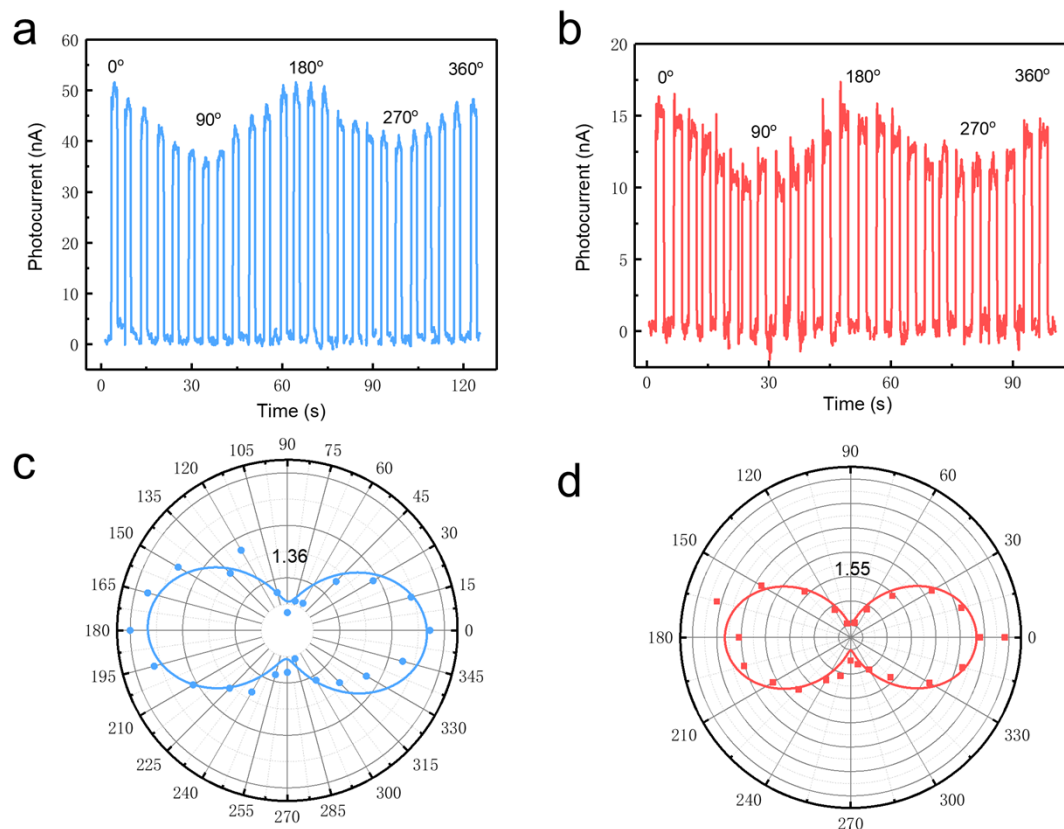

**Fig. S17** Polarization-resolved photodetector based on SWCNT-MoS<sub>2</sub> hybrid films. (a-b) Light linear polarization dependence of photocurrent for 405 and 785 nm light illuminations, respectively. (c-d) Polar coordinates of the polarization-sensitive photoreponse at 405 and 785 nm illuminations, respectively.

**Table S1** Comparison of state-of-art PTE photodetectors

| Materials                      | Responsivity              | Response speed         | Spectral range | Polarization ratios | References |
|--------------------------------|---------------------------|------------------------|----------------|---------------------|------------|
| graphene                       | 2.85 $\mu\text{A W}^{-1}$ | 4 ps                   |                | 0                   | 1          |
| WTe <sub>2</sub>               | 50 $\mu\text{A W}^{-1}$   | 0.22 ns                | 650-850 nm     |                     | 2          |
| TaIrTe <sub>4</sub>            | 20 $\mu\text{A W}^{-1}$   | 27 $\mu\text{s}$       | Vis-IR         | 1.13 (660 nm)       | 3          |
| SWCNT film                     | 28 mV W <sup>-1</sup>     | 32 $\mu\text{s}$       | Vis-IR         | 2 (660 nm)          | 4          |
| <i>p-n</i> junction SWCNT film | 1 V W <sup>-1</sup>       | 0.6 s-90 $\mu\text{s}$ | Vis-IR         | 1.28 (660 nm)       | 5          |
| SWCNT-MoS <sub>2</sub>         | 88 $\mu\text{A W}^{-1}$   | ~100 ms                | 405-785 nm     | 1.55 (532nm)        | This work  |

### Supplementary References

1 D. Sun, G. Aivazian, A. M Jones, J.S. Ross, W. Yao, D. Cobden and X.D. Xu, *Nat. Nanotechnol.*, 2012, **7**, 114-118.

2 Q. Wang, C. Yesilyurt, F. Liu, Z. B. Siu, K. Cai, D. Kumar, Z. Liu, M. B. A. Jalil and

- H. Yang, *Nano Lett.*, 2019, **19**, 2647-2652.
- 3 J. Lai, Y. Liu, J. Ma, X. Zhuo, Y. Peng, W. Lu, Z. Liu, J. Chen and D. Sun, *ACS Nano*, 2018, **12**, 4055-4061.
- 4 S. Nanot, A. W. Cummings, C. L. Pint, A. Ikeuchi, T. Akiho, K. Sueoka, R. H. Hauge, F. Leonard and J. Kono, *Sci. Rep.*, 2013, **3**, 1335.
- 5 X. He, X. Wang, S. Nanot, K. Cong, Q. Jiang, A. A. Kane, J. E. Goldsmith, R. H. Hauge, F. Leonard and J. Kono, *ACS Nano*, 2013, **7**, 7271-7277.
